# Supplementary material for: Intensive Postural and Motor Activity Program Reduces Scoliosis Progression in People with Rett Syndrome
Source: MDPI journal article supplement (doi:10.3390/jcm11030559), 2022-01-22
Supplement: s1 [file s1]

Table S1. Individual data of each participant's age, genetic mutation, RARS subscales and total scores, and daily physical activity level at T1.

| No. | Mutation                               | Age at T1 | RARS at T1 |         |       |           |              |                      |       | m-BAR at T1 |
|-----|----------------------------------------|-----------|------------|---------|-------|-----------|--------------|----------------------|-------|-------------|
|     |                                        |           | Cognitive  | Sensory | Motor | Emotional | Indipendence | Rett characteristics | Total |             |
| 1   | R306C                                  | 11,5      | 12,5       | 4       | 13    | 4         | 11,5         | 29,5                 | 74,5  | 74          |
| 2   | P152R                                  | 22,0      | 12,5       | 3       | 9,5   | 2,5       | 9,5          | 24,5                 | 61,5  | 101         |
| 3   | pro225arg                              | 27,7      | 15,5       | 5,5     | 9,5   | 4         | 11           | 22                   | 67,5  | 62          |
| 4   | c.468 C>G                              | 13,1      | 15         | 3       | 13    | 3         | 12           | 25                   | 71    | 52          |
| 5   | R168*                                  | 17,2      | 10,5       | 2       | 5,5   | 2,5       | 10           | 19,5                 | 50    | 121         |
| 6   | R306C                                  | 12,8      | 18,5       | 5       | 10,5  | 5         | 11           | 27                   | 77    | 130         |
| 7   | R133C                                  | 12,3      | 13,5       | 2,5     | 7     | 3         | 4,5          | 15                   | 45,5  | 97          |
| 8   | T158M                                  | 6,5       | 17,5       | 4       | 9     | 4         | 11,5         | 19                   | 65    | 124         |
| 9   | P133C                                  | 13,3      | 15,5       | 3       | 10,5  | 4         | 10,5         | 29,5                 | 73    | 81          |
| 10  | R255*                                  | 10,3      | 15         | 2       | 8,5   | 3         | 12           | 21,5                 | 62    | 102         |
| 11  | R255*                                  | 31,6      | 10,5       | 3,5     | 12,5  | 3,5       | 12           | 25                   | 67    | 65          |
| 12  | T158M                                  | 16,7      | 11,5       | 2       | 13    | 3         | 11           | 25,5                 | 66    | 73          |
| 13  | R106W                                  | 14,4      | 13,5       | 4       | 13    | 3         | 11,5         | 21                   | 66    | 90          |
| 14  | T158M                                  | 12,7      | 10,5       | 3       | 10    | 2,5       | 9            | 19,5                 | 54,5  | 109         |
| 15  | c. 1063_1326del264 +<br>c. 1063insTGCG | 13,6      | 11         | 2       | 10,5  | 2         | 12           | 24                   | 61,5  | 105         |
| 16  | R294X                                  | 3,8       | 14         | 5       | 10    | 2,5       | 10           | 27,5                 | 69    | 145         |
| 17  | R294X                                  | 12,9      | 16,5       | 3       | 13    | 4         | 12           | 33                   | 81,5  | 56          |
| 18  | T158M                                  | 38,3      | 9,5        | 2       | 8,5   | 3         | 9            | 23,5                 | 55,5  | 110         |
| 19  | R255X                                  | 13,3      | 16         | 3,5     | 11    | 4         | 12           | 27                   | 73,5  | 89          |
| 20  | R168X                                  | 8,8       | 9          | 2       | 9,5   | 2         | 12           | 17                   | 51,5  | 69          |

Table S2. Individual data of each participant's RESMES subscales and total scores measured at T1 and T2.

| No. | RESMES at T1 |         |            |         |     |        |       | RESMES at T2 |         |            |         |     |        |       |
|-----|--------------|---------|------------|---------|-----|--------|-------|--------------|---------|------------|---------|-----|--------|-------|
|     | Standing     | Sitting | Transition | Walking | Run | Stairs | Total | Standing     | Sitting | Transition | Walking | Run | Stairs | Total |
| 1   | 4            | 9       | 18         | 14      | 4   | 8      | 57    | 7            | 3       | 17         | 17      | 4   | 8      | 56    |
| 2   | 1            | 0       | 16         | 6       | 4   | 6      | 33    | 0            | 0       | 14         | 4       | 4   | 6      | 28    |
| 3   | 2            | 0       | 18         | 7       | 4   | 6      | 37    | 0            | 0       | 17         | 6       | 4   | 6      | 33    |
| 4   | 6            | 1       | 24         | 17      | 4   | 8      | 60    | 7            | 0       | 24         | 14      | 4   | 8      | 57    |
| 5   | 0            | 0       | 13         | 2       | 4   | 6      | 25    | 0            | 0       | 13         | 1       | 4   | 6      | 24    |
| 6   | 0            | 0       | 7          | 0       | 4   | 4      | 15    | 0            | 0       | 7          | 0       | 4   | 4      | 15    |
| 7   | 0            | 0       | 0          | 0       | 4   | 2      | 6     | 0            | 0       | 0          | 0       | 4   | 2      | 6     |
| 8   | 1            | 0       | 20         | 2       | 4   | 8      | 35    | 0            | 0       | 20         | 2       | 4   | 6      | 32    |
| 9   | 0            | 0       | 13         | 5       | 4   | 7      | 29    | 0            | 0       | 13         | 3       | 4   | 6      | 26    |
| 10  | 0            | 0       | 16         | 5       | 4   | 6      | 31    | 0            | 0       | 13         | 5       | 4   | 6      | 28    |
| 11  | 11           | 0       | 22         | 18      | 4   | 8      | 63    | 8            | 0       | 21         | 16      | 4   | 8      | 57    |
| 12  | 11           | 5       | 24         | 18      | 4   | 8      | 70    | 10           | 2       | 24         | 18      | 4   | 8      | 66    |
| 13  | 0            | 0       | 8          | 2       | 4   | 6      | 20    | 0            | 0       | 7          | 3       | 4   | 6      | 20    |
| 14  | 6            | 3       | 19         | 15      | 4   | 8      | 55    | 6            | 3       | 19         | 14      | 4   | 8      | 54    |
| 15  | 0            | 0       | 7          | 0       | 4   | 6      | 17    | 0            | 0       | 7          | 0       | 4   | 4      | 15    |
| 16  | 4            | 0       | 10         | 6       | 4   | 8      | 32    | 3            | 0       | 10         | 5       | 4   | 7      | 29    |
| 17  | 8            | 1       | 21         | 15      | 4   | 8      | 57    | 4            | 0       | 22         | 12      | 4   | 8      | 50    |
| 18  | 0            | 0       | 7          | 2       | 4   | 3      | 16    | 0            | 0       | 7          | 2       | 4   | 3      | 16    |
| 19  | 0            | 0       | 9          | 0       | 4   | 6      | 19    | 0            | 0       | 9          | 1       | 4   | 4      | 18    |
| 20  | 9            | 0       | 19         | 18      | 4   | 8      | 58    | 7            | 0       | 18         | 18      | 4   | 8      | 55    |

Table S3. Individual data of each participant's scoliosis severity level at T1, time elapsed between pre- (T1) and post- (T2) intervention spine radiographs, Cobb's angles measured at T1 and T2, and Cobb's angle variation between T1 and T2. Participants' scoliosis severity level was coded with a 0 to 3 ordinal score (0: no scoliosis; 1: mild scoliosis, curve visible only on thorough examination in forwarding bending; 2: moderate scoliosis, obvious curve in both upright and forward bending; 3: severe scoliosis, pronounced curve preventing upright position without external support).

| Nº | Scoliosis severity at T1 | Months between T1-T2 | Cobb's angle at T1 (°) | Cobb's angle at T2 (°) | Curve convexity | Δ Cobb's angle (°) |
|----|--------------------------|----------------------|------------------------|------------------------|-----------------|--------------------|
| 1  | 2                        | 7,9                  | 23                     | 24                     | Rt              | 1                  |
| 2  | 2                        | 10,2                 | 33                     | 28                     | Rt              | -5                 |
| 3  | 2                        | 15,3                 | 32                     | 36                     | Rt              | 4                  |
| 4  | 3                        | 12,5                 | 27                     | 41                     | Lt              | 14                 |
| 5  | 1                        | 14,0                 | 11                     | 24                     | Lt              | 12                 |
| 6  | 1                        | 17,7                 | 14                     | 18                     | Lt              | 5                  |
| 7  | 2                        | 16,6                 | 20                     | 27                     | Rt              | 7                  |
| 8  | 1                        | 14,6                 | 10                     | 0                      | Lt              | -10                |
| 9  | 2                        | 18,4                 | 25                     | 21                     | Lt              | -4                 |
| 10 | 2                        | 9,8                  | 21                     | 19                     | Rt              | -2                 |
| 11 | 3                        | 8,9                  | 41                     | 30                     | Rt              | -11                |
| 12 | 3                        | 8,4                  | 16                     | 17                     | Rt              | 2                  |
| 13 | 3                        | 9,3                  | 42                     | 65                     | Lt              | 23                 |
| 14 | 3                        | 10,0                 | 56                     | 58                     | Rt              | 2                  |
| 15 | 2                        | 11,8                 | 24                     | 30                     | Rt              | 6                  |
| 16 | 1                        | 11,8                 | 13                     | 1                      | Rt              | -13                |
| 17 | 3                        | 7,4                  | 39                     | 36                     | Lt              | -3                 |
| 18 | 3                        | 17,3                 | 41                     | 39                     | Lt              | -3                 |
| 19 | 1                        | 10,3                 | 13                     | 16                     | Rt              | 4                  |
| 20 | 3                        | 13,4                 | 8                      | 14                     | Rt              | 6                  |
